# Supplementary material for: TOwards enhancing Paediatric Intensive Care for Children with Medical Complexity (ToPIC CMC): a mixed-methods study protocol using Experience-based Co-design
Source: HighWire-hosted journal article supplement (doi:10.1136/bmjopen-2022-066459), 2022-09-01
Supplement: bmjopen-2022-066459supp002_data_supplement.pdf [file bmjopen-2022-066459supp002_data_supplement.pdf]

## Appendix 2: Participant Demographic and Hospital Descriptive Data

| Child                                                                                                                                                                                                                                                     | Parent                     | HCP                        |
|-----------------------------------------------------------------------------------------------------------------------------------------------------------------------------------------------------------------------------------------------------------|----------------------------|----------------------------|
| Age                                                                                                                                                                                                                                                       | Age                        | Age                        |
| Gender                                                                                                                                                                                                                                                    | Gender                     | Gender                     |
| Previous PICU Admissions                                                                                                                                                                                                                                  | Highest Level of Education | Highest Level of Education |
| Previous Hospital Admissions                                                                                                                                                                                                                              | Occupation                 | Professional Role          |
| Home care needs                                                                                                                                                                                                                                           | Relationship to child      | PICU Experience            |
| Hospital Descriptives:<br><ul style="list-style-type: none"> <li>• Admitting Diagnosis</li> <li>• Co-Morbid Diseases</li> <li>• Length of Stay</li> <li>• Invasive Procedures Score*</li> <li>• Pediatric Risk of Mortality (PRISM-III) Score*</li> </ul> | Marital status             | Hospital Experience        |
|                                                                                                                                                                                                                                                           | Other Children             |                            |
|                                                                                                                                                                                                                                                           | Caregiving Support         |                            |
|                                                                                                                                                                                                                                                           | Ethnic/Cultural Origins    |                            |
|                                                                                                                                                                                                                                                           |                            |                            |

\*Rennick et al (2002)... Rennick, J. E., Johnston, C. C., Dougherty, G., Platt, R., & Ritchie, J. A. (2002). Children's psychological responses after critical illness and exposure to invasive technology. *Journal of Developmental & Behavioral Pediatrics*, 23(3), 133-144.

\*\*Pollack et al... Pollack, M. M., Patel, K. M., & Ruttimann, U. E. (1996). PRISM III: an updated Pediatric Risk of Mortality score. *Critical care medicine*, 24(5), 743-752.
